# Supplementary material for: Fast and controlled growth of two-dimensional layered ZrTe3 nanoribbons by chemical vapor deposition
Source: Royal Society of Chemistry journal article supplement (doi:10.1039/c9ce00793h), 2019-01-01
Supplement: c9ce00793h1.pdf [file c9ce00793h1.pdf]

**Supporting Information**  
**A Fast and Controlled Growth of Two-dimensional Layered ZrTe<sub>3</sub> Nanoribbons by**  
**Chemical Vapor Deposition**

Xu Yu,<sup>†,‡, #</sup> Xiaokun Wen,<sup>†,‡, #</sup> Wenfeng Zhang,<sup>†,‡, \*</sup> Li Yang,<sup>†,‡</sup> Hao Wu,<sup>†,‡</sup> Xun Lou,<sup>†,‡</sup> Zijian Xie,<sup>†,‡</sup> Yuan Liu,<sup>†,‡</sup> and Haixin Chang<sup>†,‡</sup>

<sup>†</sup>Center for Joining and Electronic Packaging, State Key Laboratory of Material Processing and Die & Mould Technology, School of Materials Science and Engineering, Huazhong University of Science and Technology, Wuhan 430074, PRC.

<sup>‡</sup>Shenzhen R&D Center of Huazhong University of Science and Technology, Shenzhen 518000, PRC.

<sup>#</sup>Theses authors contributed equally to this work.

E-mail: wfzhang@hust.edu.cn

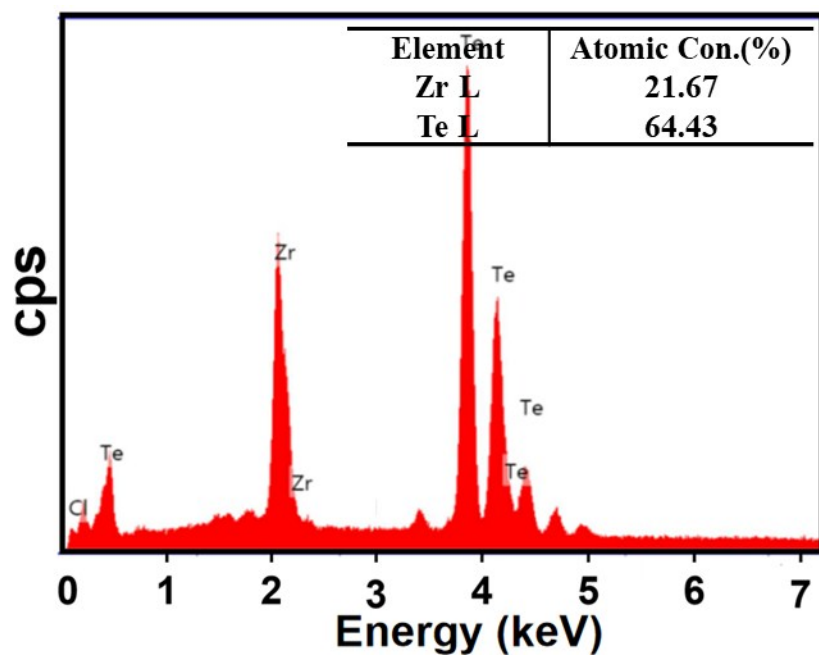

**Figure S1.** EDX spectrum of  $\text{ZrTe}_3$  nanoribbons from SEM observation (Figure 1(b)), the inset shows the Te and Zr chemical composition ( $\sim 1:3$ ).

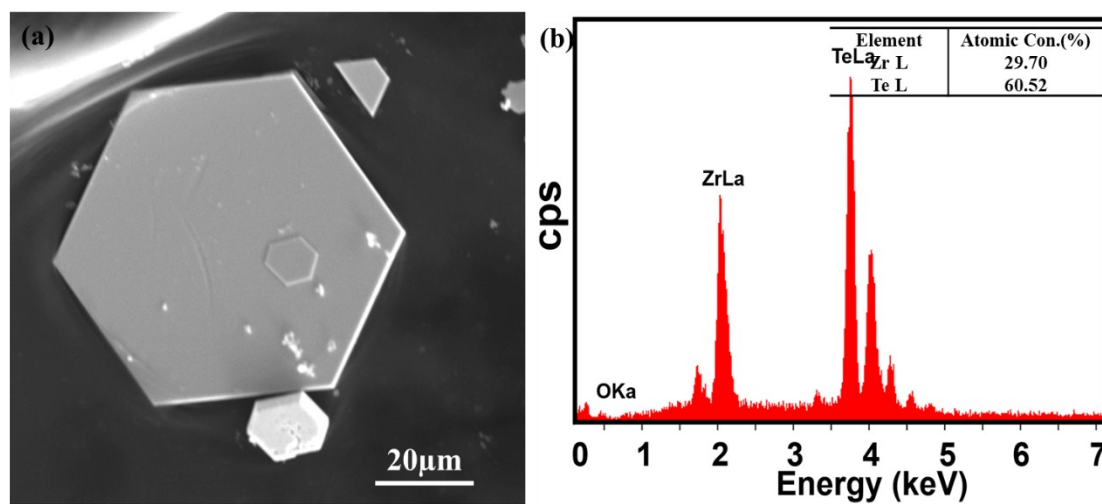

**Figure S2.** (a) SEM observation of the 2D-ZrTe<sub>2</sub> grown at 800 °C-1050 °C; (b) the corresponding EDX analysis, which indicates that Te, Zr chemical composition is ~1:2 (inset).
